# Role of Insulin in Management of Surgical Patients With Diabetes Mellitus

Irl B. Hirsch, MD  
Janet B. McGill, MD

**Because surgery is a likely event during the lifetime of patients with diabetes, health-care team members need to be aware of the metabolic problems that may occur during the perioperative period. Surgery, especially in the presence of general anesthesia, will produce a diabetogenic response. This is generally due to an elevation of counterregulatory hormones, although endogenous insulin is also suppressed. The excessive lipolysis and ketogenesis that can occur during surgery can have particularly deleterious effects for patients with diabetes. Thus, sufficient insulin must be provided during this period to suppress these catabolic processes. The major controversy regarding surgery and diabetes concerns the route of insulin administration. This article reviews the various treatment options for patients with insulin-dependent and non-insulin-dependent diabetes mellitus, with particular emphasis on the role of insulin. Special situations, e.g., outpatient surgery, coronary artery bypass, and emergency surgery, are also discussed. *Diabetes Care* 13:980-91, 1990**

**D**uring the 1960s, it was estimated that diabetic patients had a 50% chance of undergoing surgery at some point during their lifetime (1). Due to advances in medical and surgical therapies, it is likely that diabetic individuals have an even greater chance of requiring surgery today. The types of surgery

performed are influenced by the complications related to diabetes, which include kidney transplantation, penile prosthesis implantation, and ulcer debridement. Diabetic patients are also subject to the same operations required by nondiabetic patients. For example, in 1980, 11.3% of operations performed on diabetic patients in the United States were on the cardiovascular system, compared to 4.3% in nondiabetic people, and ophthalmologic procedures comprised 5.5% compared to 3.3% (2).

There are several reasons to attempt to normalize plasma glucose levels in the perioperative period. In the case of insulin-dependent diabetes mellitus (IDDM), inadequate attention to blood glucose levels can result in ketosis and acidemia, whereas all patients with glucose intolerance are susceptible to electrolyte abnormalities and volume depletion from osmotic diuresis. There are also data indicating impaired wound strength and wound healing with plasma glucose levels of  $>11.1$  mM (3-6). Hyperglycemia interferes with the leukocyte functions of chemotaxis, opsonization, and phagocytosis (7). Finally, both animal and human studies suggest that hyperglycemia exacerbates ischemic brain damage (8-10). Still, despite the technical ability to nearly normalize glycemia, prospective data are not available comparing surgical outcomes after improved blood glucose control during the perioperative period.

Over the past few years, there have been several excellent reviews concerning the management of the diabetic patient during surgery (11-14). In this article, the metabolic effects of anesthesia and surgery are discussed, with special emphasis on the role of insulin. In addition, treatment options for diabetes management during the perioperative period are reviewed.

From the Division of Metabolism of the Department of Medicine, Washington University School of Medicine, St. Louis, Missouri.

Address correspondence and reprint requests to Janet B. McGill, MD, Washington University School of Medicine, 660 South Euclid Avenue, Box 8127, St. Louis, MO 63110.

## HORMONAL CONTROL OF GLUCOSE HOMEOSTASIS

Hormonal regulation of glucose homeostasis may be broadly categorized into hormones having chiefly catabolic effects and insulin, which may be considered the primary anabolic hormone. The former group, which includes epinephrine, glucagon, cortisol, and growth hormone, is considered counterregulatory hormones. However, as shown in Table 1, this simplistic classification is not completely valid for the counterregulatory hormones, i.e., fat and protein metabolism. Therefore, the physiological roles of these hormones are characterized separately. Subsequently, the role of each hormone during the perioperative period is discussed.

**Insulin.** Insulin suppresses endogenous glucose production (both glycogenolysis and gluconeogenesis) and stimulates glucose utilization. Therefore, unless there are other intervening factors, increases in insulin secretion would lower the plasma glucose level. Inhibition of gluconeogenesis requires greater amounts of insulin than suppression of glycogenolysis. For example, in dogs, a mean immunoreactive insulin level of 438 pM results in complete suppression of glycogenolysis but persistence of gluconeogenesis (15). Although plasma glucose level is the major regulator of insulin secretion, absorbed amino acids after a mixed meal will further amplify the insulin response (16).

In protein metabolism, there are four mechanisms by which insulin may increase body protein stores: 1) increased tissue uptake of amino acids, 2) increased protein synthesis, 3) decreased proteolysis, and 4) decreased oxidation of amino acids.

Insulin stimulates fatty acid synthesis in the liver and accelerates the removal of circulating triglycerides by inducing the synthesis of lipoprotein lipase in adipose tissue. In addition, insulin effectively inhibits hormone-sensitive lipase, which catalyzes the hydrolysis of stored triglycerides. Indeed, the antilipolytic effect of insulin is considered its most sensitive action. Nurjham et al. (17), with a euglycemic clamp, showed an  $ED_{50}$  of 90 pM for antilipolytic activity versus 180 pM for inhibition of hepatic glucose production.

Insulin also has a profound suppressive effect on blood ketone levels. Insulin deficiency leads to ketoacidemia due to 1) unrestrained mobilization of free fatty acid (FFA) from adipose tissue, 2) accumulation of hepatic acetyl-CoA due to excessive FFA oxidation, and 3) a reduction in ketone utilization by peripheral tissues. The antiketogenic action of insulin is related to both its inhibition of hepatic carnitine levels and its stimulation of intrahepatic lipogenesis, thereby increasing malonyl-CoA availability (18). Carnitine is the fatty acyl-CoA molecule required for mitochondrial membrane penetration. The enzyme carnitine acyltransferase I (CAT I) catalyzes the formation of the fatty acyl-carnitine derivative, and malonyl-CoA directly inhibits CAT I. Thus, the reduced carnitine concentrations and increased malonyl-CoA

levels are responsible in directing fatty acyl-CoA into microsomes for esterification to triglycerides, rather than ketone production.

**Epinephrine.** Epinephrine stimulates glucose production and limits glucose utilization; each of these are accomplished by direct and indirect actions (19). The indirect mechanisms are largely mediated through  $\alpha_2$ -inhibition of insulin secretion and  $\beta$ -stimulation of glucagon secretion (16,19). The direct actions of epinephrine occur via  $\beta$ -adrenergic mechanisms; glucose utilization is inhibited, whereas glucose production is stimulated (20). Both glycogenolysis and gluconeogenesis are stimulated by epinephrine, and plasma glucose increases within minutes; however, this effect is transient (20; Table 1). Nevertheless, because the limitation of glucose utilization is sustained, the plasma glucose level remains elevated (19).

Other metabolic effects of epinephrine include 1) stimulation of lipolysis and ketogenesis (21), 2) reduction of net proteolysis with decreased circulating amino acid (except alanine) levels (22,23), and 3) increased thermogenesis (24). These actions also account for accumulation of the gluconeogenic substrates (lactate, alanine, and glycerol), which contribute to gluconeogenesis.

**Glucagon.** Like insulin, plasma glucose is the major regulator of glucagon secretion. As the glucose level rises, glucagon secretion is suppressed; a decline in glucose levels will stimulate glucagon secretion (16). Except for amino acids (which stimulate both glucagon and insulin secretion), glucagon secretion is reciprocal to insulin secretion. Thus, although increases in plasma glucose levels will suppress glucagon secretion, hypoglycemia, fasting, and stress will stimulate it.

Increases in plasma glucagon level produce a rise in plasma glucose by stimulating hepatic glycogenolysis and gluconeogenesis. These actions last <45 min (25). Hepatic glucose metabolism is influenced by changes in glucagon levels compared with absolute levels (25). Other important actions of glucagon include increasing hepatic ketogenesis and decreasing hepatic glycogen formation, glycolysis, and triglyceride synthesis (26). Although other catabolic hormones may play a role in the induction of ketogenesis, it is believed that glucagon is the primary signal of regulating this process (26).

**Cortisol.** Cortisol impairs carbohydrate tolerance by decreasing glucose utilization. Short-term cortisol excess reduces glucose utilization at physiological insulin levels. Chronic cortisol excess (e.g., Cushing's syndrome) is associated with an impaired glucose utilization at both physiological and supraphysiological insulin levels (27). This effect is mediated, at least in part, by a decrease in binding of insulin to its receptor (28).

Cortisol can also increase gluconeogenesis directly by gluconeogenic enzyme induction and indirectly by increasing substrate availability (28). Both proteolysis and lipolysis are stimulated by cortisol (29,30). In addition, cortisol exhibits permissive effects of glucagon and ep-

**TABLE 1**  
**Metabolic effects of anabolic and catabolic hormones**

|                | Anabolic effects |             |                   | Catabolic effects |                 |           |             |
|----------------|------------------|-------------|-------------------|-------------------|-----------------|-----------|-------------|
|                | Glycogenesis     | Lipogenesis | Protein synthesis | Glycogenolysis    | Gluconeogenesis | Lipolysis | Proteolysis |
| Insulin        | +                | +           | +                 | —                 | —               | —         | —           |
| Epinephrine    | —                | 0           | 0                 | +                 | +               | +         | —           |
| Glucagon       | —                | 0           | 0                 | +                 | +               | ?*        | +           |
| Cortisol       | ±                | ±           | —                 | —                 | +               | +         | ++          |
| Growth hormone | 0                | 0           | +                 | —                 | +               | +         | ++          |

+, Stimulatory effect; —, inhibitory effect; 0, no effect; ±, stimulatory in presence of insulin, inhibitory in absence of insulin.

\*Effects increased with nonphysiological levels.

†Effects important in absence of insulin.

inephrine on gluconeogenesis (31). Cortisol also has the anabolic action of increasing the activity of glycogen synthase (32). In insulin-deficient states, however, cortisol has potent ketogenic effects (33).

**Growth hormone.** Transient acute insulinlike effects of growth hormone have been described, affecting protein, lipid, and carbohydrate metabolism (34). However, tissues become refractory to these effects over the course of a few hours. Chronic growth hormone excess impairs insulin action, suppresses glucose utilization, and stimulates glucose production (35). Growth hormone also has important anabolic properties regarding protein synthesis (36).

Elevated growth hormone levels after 1–2 h result in accelerated lipolysis and ketogenesis, although the latter appears to be secondary to the increase in fatty acid delivery to the liver compared with a direct effect (34). This lipolytic action of growth hormone is overcome by insulin; furthermore, growth hormone does not diminish the antilipolytic efficacy of insulin (37).

## METABOLIC EFFECTS OF SURGERY

Surgery, especially in the presence of general anesthesia, will produce a diabetogenic response (Fig. 1). Hyperglycemia during surgery or postoperatively can occur in nondiabetic patients (38–45). The magnitude of the plasma glucose rise is related in part to glucose infusion rates (44). The hormonal etiology of this form of hyperglycemia is (relative) deficient insulin and C-peptide secretion, in addition to insulin resistance (38–40,42–49). The precise cause of this insulin resistance is unclear, but it is thought to be due to elevated counterregulatory hormone levels. Catecholamine increases are the rule during general anesthesia, although this is probably dependent on the anesthetic agent (50,51). Epinephrine stimulates muscle glycogenolysis which, besides providing fuel for muscle, provides lactate for hepatic gluconeogenesis. ACTH and cortisol levels are also elevated in the preoperative period, although this is also dependent on the anesthetic agent (42,44,45,47,49,52–58). Similarly, growth hormone has been shown to be

increased in most but not all studies (44,45,47,59,60). Glucagon levels have been the most variable of the counterregulatory hormone measurements during the perioperative period. Decreases, increases, and stable glucagon levels have been reported (45,57,61,62). One study showed stable intraoperative glucagon levels but increased postoperative levels (47).

Taken together, the above processes can be expected to result in excessive glycogenolysis, gluconeogenesis, lipolysis, and proteolysis during the perioperative period. However, in the nondiabetic subject, fat metabolism is different than expected. Glycerol and FFA levels are lower in surgical subjects compared with nonoperated subjects fasted for a similar period (62). Blood ketone body levels are also decreased, due in part to the lower substrate supply to the liver and to a specific intrahepatic deficit (63). This relative impairment of lipolysis is probably due to the increased insulin levels. The negative nitrogen balance that occurs postoperatively can be primarily attributed to cortisol and proteolysis-inducing factor (PIF; 64). PIF exerts its effect through increased synthesis of prostaglandin 2 and may be an active cleavage product of interleukin 1, although this remains to be clarified (65,66).

It appears that central neural blockade has only a limited impact on metabolic function. No significant changes have been noted in blood glucose, lactate, alanine, FFA, glycerol, and ketones during 20–30 min of epidural anesthesia (67). Data also suggest that epidural anesthesia has no important effect on plasma cortisol and growth hormone levels (68). However, plasma epinephrine and norepinephrine levels decrease proportionally to the level of sensory analgesia achieved during spinal anesthesia with tetracaine (69). The insulin response to hyperglycemia appears to be inhibited by a high-thoracic (T2–T6 dermatome) blockage, whereas a low-thoracic blockage has no effect on insulin secretion (70). Earlier studies are supported by a report that showed a marked amelioration of the metabolic and endocrine response to surgery in patients given a splanchnic nerve block (71).

The effects of high levels of the counterregulatory hormones, although not usually deleterious to the nondi-

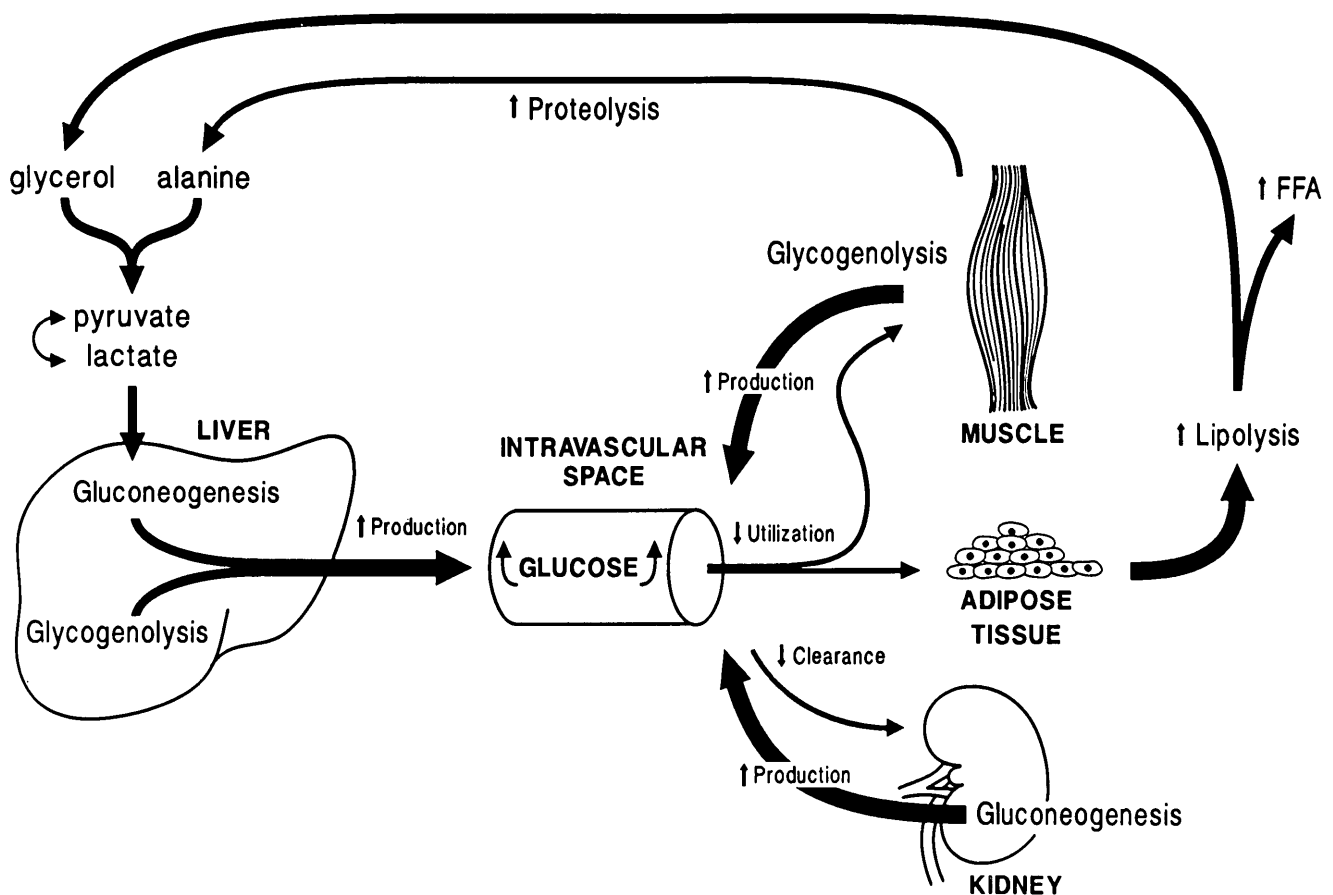

**FIG. 1. Factors resulting in hyperglycemia during surgery. Increased glucose production is due to hepatic and muscle glycogenolysis and hepatic and renal gluconeogenesis. Renal clearance of glucose from circulation may be decreased during volume depletion. Relative insulin deficiency inhibits glucose utilization.**

abetic patient, can contribute to major metabolic derangements in patients with IDDM. A different effect is encountered in the patient with non-insulin-dependent diabetes mellitus (NIDDM), who may be prone to excessive hyperglycemia, dehydration, and hyperosmolarity secondary to decreased insulin sensitivity. Providing a stable metabolic milieu in the face of this exaggerated counterregulatory hormone response to ensure an optimal surgical outcome is the task of the diabetology/surgery/anesthesiology team members. It is important to appreciate that massive plasma glucose elevations are not necessary for metabolic decompensation. Indeed, it is possible for a patient with IDDM to develop ketoacidosis with a plasma glucose level only moderately elevated. One study showed that 17% of all diagnoses of diabetic ketoacidosis (DKA) were in patients with plasma glucose levels  $<16.7$  mM, but values  $<5.6$  mM have been encountered. This phenomenon is called euglycemic DKA (72,73). Although less marked in the patient with NIDDM, changes in protein and fat metabolism might be expected due to the inability of these patients to increase insulin secretion in response to surgery-induced hyperglycemia. In both groups of patients, careful management coupled with frequent mon-

itoring of plasma glucose, electrolytes, and urinary ketones can prevent serious perturbations.

## ELECTIVE SURGERY IN PATIENTS WITH IDDM

**Preoperative evaluation.** Due to the potentially deleterious metabolic effects of surgery, preoperative evaluation and treatment to correct hyperglycemia and electrolyte abnormalities is imperative. Some authors recommend admitting patients with IDDM 48–72 h before surgery, with the intent to improve metabolic control and assess cardiovascular status (11,74), but the high costs involved with this strategy have made these longer admissions prohibitive. Indeed, many diabetic patients are now admitted on the morning of surgery. With the widespread use of self-monitoring of blood glucose, it should be possible to correct serious hyperglycemia before admission.

Preoperative assessment should include basic cardiovascular and renal testing (ECG, urinary dipstick for proteinuria, serum creatinine measurement). In one study, the most common cause of perioperative mortality was coronary artery disease (29%; 75). One recent study

suggested that diabetic patients should also be screened for autonomic neuropathy before surgery because these patients are at high risk for developing perioperative hypotension (76).

The regimen for achieving optimal preoperative glycemic control is arbitrary. There are several acceptable insulin regimens (77). Patients who use ultralente insulin at home may be changed to an intermediate-acting insulin 3 days before surgery (11). Some would consider this inconvenient, and there have been no studies that examined problems with long-acting insulin perioperatively.

**Intraoperative management.** The major controversy in insulin management during surgery is the route of insulin administration (14). Some authors advocate subcutaneous insulin administration (74), but more are now recommending intravenous insulin infusion (IVII) therapy (11,13,78,79). It would be expected that erratic insulin absorption, which normally occurs with subcutaneous insulin administration, would become even more pronounced with the fluid shifts and hemodynamic changes that occur in the perioperative period (80,81).

Taitelman et al. (82) were the first to report the use of an IVII in diabetic patients during surgery. These authors and others showed that fixed-rate IVII of 1 U/h offered no advantage over subcutaneous insulin administration (47). Thomas et al. (83) later reported on the efficacy and safety of a glucose/insulin/potassium (GIK) infusion. Several authors have advocated the use of intermittent intravenous boluses of insulin (84,85). In the study by Walts et al. (84), insulin was not given more than once every 2 h to one group of patients. This group had no rise in their plasma glucose levels after 4 h of surgery. However, this study included patients with IDDM and NIDDM. Because the half-life of intravenous insulin is between 4 and 5 min, with a biological half-life of <20 min (except in patients with antibodies to insulin; 86), few would recommend intermittent intravenous boluses of insulin in ketosis-prone diabetic patients.

The variable-rate IVII used by Watts et al. (87) was reported to be safe and efficacious. They showed a wide range of insulin requirements (0.5–5.0 U/h) during insulin infusion based on an algorithm-dependent program in a group of patients with IDDM and NIDDM (protocol patients). Within 8 h, the mean blood glucose level was within the target range of 6.7–10.0 mM, and it remained stable for the remainder of the study.

The control group who received either a conventional subcutaneous sliding scale or fixed-rate IVII had a final glucose level ranging from 1.7 to 17.0 mM at 12–24 h after surgery. The danger of the conventional therapy is obvious. Control patients also had higher mean plasma glucose levels compared with protocol patients ( $11.6 \pm 1.1$  vs.  $7.6 \pm 0.8$  mM,  $P < 0.05$ ). The decision to use a GIK infusion or variable-rate IVII is a matter of preference. We prefer the latter due to increased flexibility of altering insulin delivery rates. With the GIK infusion, 16 U of regular insulin and 10 meq potassium chloride are added to 500 ml of 10% dextrose (11). For blood

glucose levels >10 mM, the entire bag needs to be changed with a total of 20 U regular insulin/500 ml 10% dextrose. Similarly, for every blood glucose level measured >10 mM, additional increments (4 U) of insulin need to be added to a new bag. Blood glucose levels between 5 and 10 mM require no change, whereas blood glucose levels <5 mM require decrements of insulin in 4-U increments. Obviously, if blood glucose levels are catastrophically high or low, more significant changes will be needed.

Despite the fact that IVII has been recommended by investigators for the last decade, actual intraoperative management practices have not totally reflected these changes. It was recently shown in a larger American teaching hospital study (88) that perioperative management practices in a group of patients with IDDM were similar to those used in the 1962 article by Galloway and Shuman (75). Of the 76 patients who used NPH insulin at home, 61 (80%) were given half of their morning dose of NPH insulin before surgery (88; Fig. 2). Regular insulin was administered preoperatively to 23 of 85 patients (27%) who used short-acting insulin at home. Intraoperatively, 52% of patients received no insulin, whereas the remaining 48% received it primarily by intermittent intravenous boluses (Fig. 3). Only 5% of the patient population received insulin from IVII.

Even more discouraging from this study was the infrequency of blood glucose and electrolyte monitoring. Thirty-five percent of patients did not have even one blood glucose measurement during surgery. Seven of 11 patients with postoperative hypoglycemia (blood glucose level <3.3 mM) did not have intraoperative blood glucose measured, and only 20% of the patients had postoperative electrolyte determinations. Although there were no deaths in this study, there was one episode of postoperative DKA. Furthermore, there was a significant negative correlation between changes in postoperative electrolytes (from admission) and glucose levels (Fig. 4).

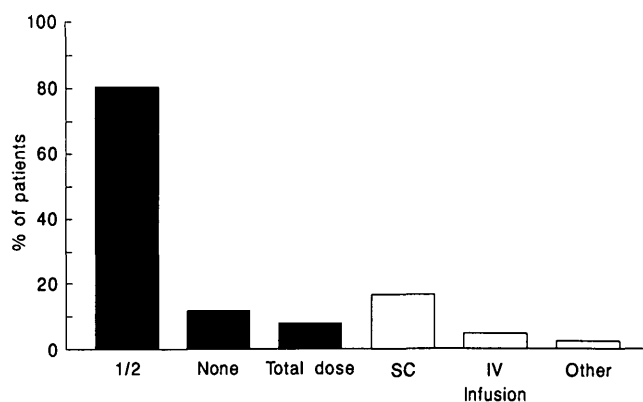

**FIG. 2.** Preoperative insulin administration in surgical patients with insulin-dependent diabetes mellitus at American teaching hospital. **Solid bars**, 76 patients who use intermediate-acting insulin at home; **open bars**, 85 patients receiving short-acting insulin at home (88). SC, subcutaneous; IV, intravenous.

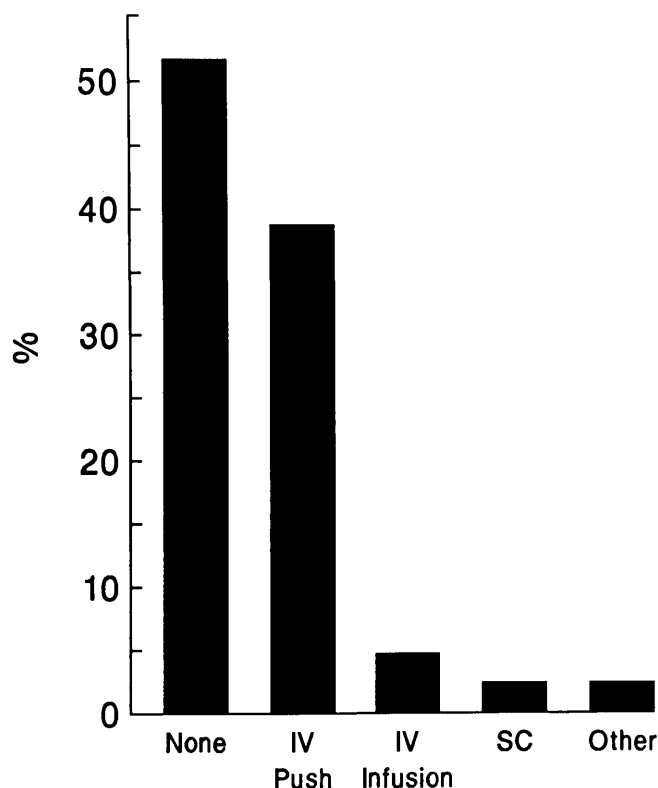

**FIG. 3.** Intraoperative regular insulin administration in 85 patients with insulin-dependent diabetes mellitus at American teaching hospital (88). SC, subcutaneous; IV, intravenous.

It can only be speculated that inadequate subcutaneous insulin administration in the setting of elevated counterregulatory hormone levels resulted in ketoacid accumulation. Obviously, prospective studies examining the pharmacokinetics and metabolic effects of perioperative subcutaneous and intermittent intravenous boluses of insulin are needed.

Although perioperative glycemic goals are arbitrary (6.6–10 vs. 10–14 mM; 74,87), it is imperative that insulin and glucose infusions are matched. The current recommendation calls for 0.25–0.35 U insulin/g glucose, although insulin-resistant states (obesity, sepsis, glucocorticoid excess) will mandate larger ratios (14,89). Patients undergoing cardiopulmonary bypass are perhaps the most insulin resistant (90). Hypothermia, large volumes of glucose-containing fluids, and use of adrenergic agents all have deleterious metabolic effects in the diabetic patient (19,45,91).

**Glucose.** The average nondiabetic adult needs a minimum of 100–125 g (400–500 cal) exogenous glucose/day for protein sparing and ketosis prevention (92,93). Although this quantity of glucose was considered adequate for a 50% reduction in protein catabolism during starvation (93), another study found that postoperative patients receiving 100 g glucose/day had only a 23% decrease in urinary nitrogen (94). Wolfe and Peters (95) showed that in fasting healthy volunteers, glucose in-

fused at a rate of  $1 \text{ mg} \cdot \text{kg}^{-1} \cdot \text{min}^{-1}$  (4.2 g/h for a 70-kg man) had no effect on the rate of release of glycerol or FFA. However, at  $4 \text{ mg} \cdot \text{kg}^{-1} \cdot \text{min}^{-1}$  (16.8 g/h for a 70-kg man), the rates of both release of glycerol and FFA were suppressed. This type of kinetic study has not been performed during surgery. The prevention of ketone body and FFA accumulation in all surgical patients is theoretically important because elevated levels of circulating FFA have been shown to increase myocardial oxygen consumption and, in some instances, the risk of arrhythmias (96,97).

Patients should be given sufficient glucose to prevent hypoglycemia and to provide basal energy requirements during surgery. Some authors recommend 10 g glucose/h ( $2.4 \text{ mg} \cdot \text{kg}^{-1} \cdot \text{min}^{-1}$ ), although others suggest 5 g/h ( $1.2 \text{ mg} \cdot \text{kg}^{-1} \cdot \text{min}^{-1}$ ; 1,11,78,79,87). Additional studies are needed to determine how much glucose is required to prevent unnecessary fat and protein catabolism.

**Fluids.** In general, a standard solution of 5% dextrose in 0.45% saline is infused at a rate that will provide adequate calories and replacement fluids. Any additional fluids should be nonglucose containing. However, if fluids need to be restricted, glucose can be given as 20 or 50% solutions at slower rates. When 20 or 50% solutions are used, infusion via a central venous catheter is recommended because the concentrated fluids increase the risk of peripheral venous thrombosis.

Although lactated Ringer's solution is widely used during surgery, lactate is a gluconeogenic precursor that is rapidly metabolized, particularly in a starved or catabolic state (98). Thomas and Alberti (99) showed that patients with NIDDM not receiving intravenous fluids during surgery had a mean plasma glucose rise of 2.2 mM, whereas those receiving lactated Ringer's solution (29–44 mmol) had a mean plasma glucose increase of

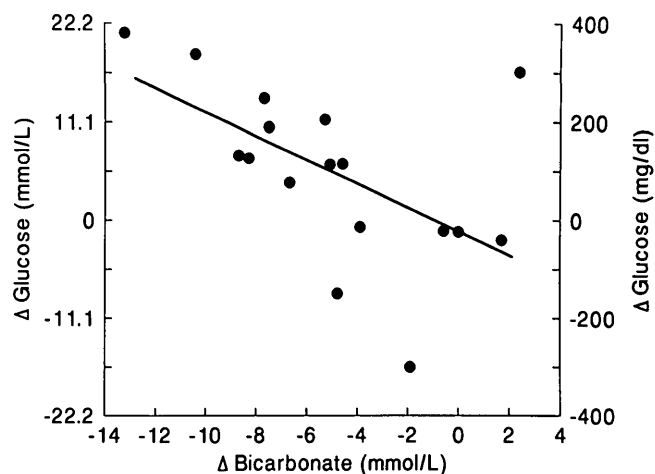

**FIG. 4.** Changes in blood glucose and bicarbonate levels (admission to postoperative) in 17 patients with insulin-dependent diabetes mellitus undergoing surgery ( $R = -0.53$ ,  $P < 0.05$ ; 88).

7.5 mM. Higher insulin dosages may be required for diabetic patients receiving lactated Ringer's solution during the perioperative period. In a recent study, however, the infusion of lactate at the rate of  $25 \mu\text{mol} \cdot \text{kg}^{-1} \cdot \text{min}^{-1}$  over 3 h ( $\sim 300 \text{ mmol}$ ) in nondiabetic subjects did not alter plasma glucose production (100). Additional study regarding the effects of lactated Ringer's solution in the diabetic population undergoing surgery is needed.

**Postoperative management.** Although there have been many recommendations for the postoperative management of patients with diabetes, no controlled studies have been performed comparing postoperative regimens when the preoperative and intraoperative regimens were similar. There appears to be no advantage in the use of a sliding-scale subcutaneous insulin regimen after surgery. Although this is a simple method for handling diabetic patients postoperatively, traditional sliding-scale regimens are based on retrospective hyperglycemia and tend to induce major swings in plasma glucose levels. Besides the erratic insulin absorption that can be expected during this time, the sliding scale is based only on guess work.

With a variable-rate IVII or GIK infusion, postoperative management is simple and flexible. Capillary glucose can be monitored at the bedside every 1–2 h, and appropriate adjustments can easily be made to achieve target blood glucose values. Some find it easier to stop the insulin infusion when food is first eaten, but we prefer to continue the insulin infusion through the first meal in the event of postoperative vomiting (14). The usual insulin regimen may be reinstituted when the IVII is stopped.

**Outpatient surgery.** Just as trends in diabetes care have changed, operations that in the past would have only been considered as inpatient procedures are now routinely performed on an outpatient basis. Although the procedures may be considered minor by patients and their surgeons, general anesthesia is still required in most cases (101). Because major changes in counterregulatory hormones can occur during minor procedures under general anesthesia, it is more logical to classify patients as inpatient versus outpatient. Indeed, the metabolic perturbations are similar in each surgical population.

There are few studies examining the treatment options for outpatient operations in patients with IDDM. Christiansen et al. (102) compared two groups of IDDM patients having minor surgery under general anesthesia. One group received an insulin-glucose infusion, and the other received conventional subcutaneous insulin therapy. The former group had significantly better blood glucose control, although there were no differences between the two groups in lactate,  $\beta$ -hydroxybutyrate, and glycerol levels (FFA was not measured). Unfortunately, C-peptide measurements were not made. Because the mean age of both groups was 52 yr (with patients  $>70$  yr of age in both groups), it is likely that some of the subjects were actually patients with NIDDM.

This could, at least in part, explain why there were no differences in the measured metabolites. Nevertheless, this study suggests that insulin-deficient patients are optimally managed with an IVII during surgery.

There will be many situations where it is acceptable to use a subcutaneous regimen during brief outpatient surgical procedures. The decision not to begin an insulin infusion will depend on 1) the outpatient's current metabolic status (e.g., individual with marked hyperglycemia and/or acidemia should be placed on an insulin infusion), 2) preoperative insulin regimen (e.g., it would be easier to continue with subcutaneous insulin for patients who use beef or pork ultralente insulin), 3) type of diet the outpatient will be allowed to eat after the operation, and 4) the physician's ability to handle a metabolic crisis related to protracted postoperative nausea and vomiting, a common complication after outpatient anesthesia (103). It was recently reported that 18% of unanticipated hospital admissions after ambulatory surgery on a general patient population were due to intractable vomiting (104). Furthermore, because nausea and vomiting can be early harbingers to DKA, close blood glucose, electrolyte, and urinary ketone monitoring is necessary for any diabetic patient with postoperative emesis.

If the patient is to receive subcutaneous insulin for an outpatient operation, there are several strategies that can be used to achieve metabolic stability. If the patient normally takes NPH and regular insulin before breakfast and supper, 50–66% the usual dose of each type of insulin can be given in the morning unless there is evidence for fasting hypoglycemia or near hypoglycemia (blood glucose  $<4.4 \text{ mM}$ ). In the latter case, the regular insulin dose can be held until the capillary glucose level is  $>6.7 \text{ mM}$ . The lower dosage of NPH insulin will reduce the risk of afternoon hypoglycemia if surgery is delayed or the patient develops postoperative emetic sequelae. Because supplemental regular insulin can be given later in the day, the full dose of NPH insulin is not necessary. The patient should be given a glucose infusion ( $5 \text{ g/h}$ ), and capillary glucose levels should be checked hourly.

If oral intake is tolerated immediately after the procedure, the remainder of the morning regular insulin should be given 20–30 min before resuming a regular diet. However, additional regular insulin may be needed if the capillary glucose level is  $>11.1 \text{ mM}$ . This regimen depends on a degree of guesswork and may be associated with misjudgment.

The patient who takes animal-species ultralente insulin should be given the usual dose of this type of insulin. Regular insulin is only necessary for capillary glucose levels of  $>11.1 \text{ mM}$ . Decreasing the ultralente insulin dose on the morning of surgery will have no effect on plasma glucose levels during the procedure, and changing to a different type of insulin several days before the procedure is unnecessarily complicated for patients undergoing brief ambulatory surgical procedures.

## ELECTIVE SURGERY IN PATIENTS WITH NIDDM

**Ambulatory surgery.** Most patients undergoing surgery have NIDDM, although there has been less attention paid to the management of diabetes in this population. Due to the high prevalence of macrovascular disease in these patients, many in this group will have angiographic studies, angioplasties, ulcer debridements, and abscess drainage procedures that often can be performed on an outpatient basis (105). In addition, this population will frequently present for cataract extraction (106).

Most agree that well-controlled patients with NIDDM treated with diet or oral hypoglycemic agents (OHAs) do not require any special treatment before and during surgery. If fasting plasma glucose for the diet-treated patient is  $<7.8$  mM, hourly blood glucose levels should be measured. Patients with this degree of glycemic control treated with an OHA may be given their medication and started on a glucose infusion at the usual time ( $\sim 0700$ ), although there is no agreement on this issue. Some investigators suggest stopping OHA treatment the evening before surgery, with chlorpropamide stopped 48–72 h preoperatively (11,12). However, there are no data examining this practice.

Treatment decisions for higher glucose levels are more controversial for this outpatient population. Perioperative insulin therapy should be considered when fasting or random blood glucose levels are  $>11.1$  mM and definitely initiated when they are  $>13.9$  mM. These values are chosen for the following reasons. First, fasting plasma glucose levels  $>11.1$  mM tend to manifest absolute deficiency with respect to insulin secretion (107). Second, the renal threshold for glucose is  $\sim 10.0$ – $11.1$  mM in most patients with normal renal function (108). Osmotic diuresis with resulting water and electrolyte losses occur when this glucose level is exceeded. Finally, the data indicating impaired wound strength and wound healing with plasma glucose levels  $>11.1$  mM need to be considered (3–6).

The decision to begin a variable-rate IVII or GIK infusion should be individualized depending on the patient and type of operative procedure. If an infusion is not started, subcutaneous regular insulin should be given. It is difficult to give a precise recommendation regarding the amount of insulin that should be administered to maintain euglycemia during and after the procedure. Four to 6 U of subcutaneous regular human insulin is a reasonable initial dose for a surgical patient not previously treated with insulin. More significant hyperglycemia ( $\geq 19.4$  mM) should be treated with an IVII.

Malling et al. (109) recently studied two groups of patients with NIDDM during ambulatory surgical procedures. The patients were treated with either a GIK infusion or subcutaneous insulin followed by an infusion of glucose. Mean fasting glucose levels were  $<8$  mM, and all subjects were taking OHA at home. There was

no difference between the two groups in blood glucose levels and metabolic ( $\beta$ -hydroxybutyrate, lactate, glycerol, alanine) or hormonal (insulin, glucagon, growth hormone) parameters. Therefore, both of these treatment options are reasonable for this outpatient surgical population.

Patients with NIDDM previously taking insulin at home also have the option of receiving either an IVII or subcutaneous insulin during the perioperative period. The same principles of insulin strategy discussed for the patient with IDDM apply to this population. Furthermore, some of these patients are insulinopenic and thus are ketosis prone. Finally, for any patient who requires insulin therapy, there is less guesswork when an insulin infusion (vs. subcutaneous insulin) is used during the operation, particularly for patients at risk for developing postoperative nausea and vomiting.

**Intracavitary surgery.** Patients with NIDDM are insulin resistant (107,110). As previously discussed, surgical stress potentiates this insulin resistance, and larger dosages of insulin are required to prevent hyperglycemia. However, patients treated with diet alone, who have fasting plasma glucose levels of  $<7.9$  mM, can be treated with observation alone. An insulin infusion should be initiated if the capillary glucose level is  $>11.1$  mM during the operation. Alberti and Thomas (111) studied a group of patients with NIDDM who had a mean preoperative plasma glucose level of 8.9 mM. When these patients received no insulin (or OHA) therapy for their hyperglycemia their mean plasma glucose level 4 h postoperatively was 14.2 mM. These investigators concluded that all patients having major surgery who are taking an OHA should be started on an insulin-glucose infusion, because mean plasma glucose levels remained constant in the insulin-treated group (from 10.3 to 10.1 mM) 4 h after surgery compared with the increase noted above in the untreated group. In addition,  $\beta$ -hydroxybutyrate and FFA levels were lower in the insulin-treated group. Optimal management of these patients involves use of insulin and glucose infusions, starting with an insulin dose of 1.0 U/h. Patients with NIDDM who require insulin should be treated the same way during major surgery as the patient with IDDM.

Hyperosmolar hyperglycemic nonketotic coma has been reported as a postoperative complication in patients with NIDDM. This syndrome is characterized by marked hyperglycemia, plasma hyperosmolality, profound dehydration, absence of ketoacidosis, and variable mental status changes. Due to the increased plasma glucose levels and insulin resistance present in coronary artery bypass operations, it is not surprising that this complication is much more likely to occur in this setting (45,91,112–114). Werb et al. (45) found mean  $\pm$  SE plasma glucose levels of  $31.8 \pm 4.8$  mM when nondiabetic patients were administered a cardioplegic solution (106 g glucose) during hypothermia. Seki (113) reported that the high mortality (42%) in patients with hyperosmolar hyperglycemic nonketotic coma undergo-



ing cardiac operations was due in part to the duration of time between the onset of polyuria and diagnosis ( $7.5 \pm 0.8$  days in nonsurvivors vs.  $4.5 \pm 0.8$  days in survivors). Mortality was also found to be higher in patients without a known diagnosis of diabetes. In an earlier study, 66% of the patients had no history of diabetes (114). The dehydration in this group is further exacerbated by the routine postoperative use of loop diuretics. Therefore, diabetic patients undergoing coronary artery bypass surgery represent a special therapeutic challenge, and frequent perioperative blood glucose measurements are critical to avoid metabolic decompensation. Alberti and Marshall (14) suggest blood glucose monitoring every 15–30 min intraoperatively in patients with known diabetes.

### EMERGENCY SURGERY

In the earlier study by Galloway and Shuman (75), 5% of all diabetic patients required emergency surgery. Of the operations performed, appendectomy was the most common major procedure (33% of all major procedures), and lower-extremity incision and drainage and lower-extremity amputation for infection were the most common minor procedures (39% of all minor procedures). Thirty-one percent of all patients were admitted with plasma glucose levels  $>11.1$  mM, although data were not provided for the number of patients meeting criteria for DKA.

The first priority should be to fully evaluate the metabolic status of all diabetic patients scheduled for emergency surgery. Urine and serum acetone, electrolytes, plasma glucose, and pH should be sent to the laboratory. A saline infusion should be started, and if clinically indicated, a central venous catheter should be inserted. If DKA is confirmed, surgery should be delayed while standard treatment for this metabolic emergency is instituted (115). Campbell et al. (116) showed that 63% of diabetic patients presenting with DKA and severe abdominal pain and tenderness had disappearance of these symptoms after DKA was adequately treated. Episodes of this unexplained pain were reported in patients with IDDM who were  $<40$  yr and markedly acidemic (serum bicarbonate  $<10$  meq/L). Conversely, Wheelock et al. (74) point out that rebound abdominal tenderness, as seen in a surgical emergency, may be masked in the diabetic patient. The etiology of this phenomenon is not known, although it is probably due to diabetic neuropathy.

### CONCLUSION

**T**he hormonal environment during the perioperative period promotes protein and fat catabolism, and glucose production. The metabolic consequences of these processes may have devastating consequences in the diabetic patient. The basic princi-

ple of this review is that sufficient insulin and glucose are needed to prevent tissue breakdown. Unfortunately, there have been few carefully controlled studies comparing different treatment regimens for diabetic patients. Other than DKA and hyperosmolar hyperglycemic nonketotic coma, there is no direct evidence that normalization of these metabolic processes effects surgical outcome. Additional studies examining the effects of glycemic control in the perioperative period on wound healing, infection, and length of hospital stay are clearly needed.

### ACKNOWLEDGMENTS

This work was supported by United States Public Health Service Grants DK-07120, RR-0036, and DK-20579.

We thank Dr. Simon R. Heller and Ruth Farkas-Hirsch for constructive criticism and suggestions. We also thank Rebecca Niederlander for secretarial assistance.

### REFERENCES

1. Root HF: Pre-operative care of the diabetic patient. *Postgrad Med* 40:439–44, 1966
2. Sinnock P: *Hospital Utilization for Diabetes*. Harrison MI, Hamman RF, Eds. Washington, DC, U.S. Dept. of Health and Human Services, 1985, p. XXVI 1–11 (NIH publ. no. 85-1468)
3. McMurray JF: Wound healing with diabetes mellitus: better glucose control for better healing in diabetes. *Surg Clin North Am* 64:769–78, 1984
4. Goodson WH, Hunt TK: Status of wound healing in experimental diabetes. *J Surg Res* 22:221–27, 1977
5. Rosen RB, Enquist IF: The healing wound in experimental diabetes. *Surgery* 50:525–28, 1961
6. Yue DK, McLennan S, Marsh M, Mai YW, Spaliviero J, Delbridge L, Reeve T, Turtle JR: Effects of experimental diabetes, uremia, and malnutrition on wound healing. *Diabetes* 36:295–99, 1987
7. Rayfield EJ, Ault MJ, Keusch GT, Brothers MJ, Nechomias C, Smith H: Infection and diabetes: the case for glucose control. *Am J Med* 72:439–50, 1982
8. Pulsinelli WA, Waldman S, Rawlinson D, Plum F: Moderate hyperglycemia augments ischemic brain damage: a neuropathologic study in the rat. *Neurology* 32:1239–46, 1982
9. Pulsinelli WA, Levy DE, Sigsbee B, Scherer P, Plum F: Increased damage after ischemic stroke in patients with hyperglycemia with or without established diabetes mellitus. *Am J Med* 74:540–44, 1983
10. Longstrech WT, Invi TS: High blood glucose level on hospital admission and poor neurological recovery after cardiac arrest. *Ann Neurol* 15:59–63, 1984
11. Alberti KGMM, Gill GV, Elliott MJ: Insulin delivery during surgery in the diabetic patient. *Diabetes Care* 5 (Suppl. 1):65–77, 1982
12. Podolsky S: Management of diabetes in the surgical patient. *Med Clin North Am* 66:1361–72, 1982
13. Schade DS: Surgery and diabetes. *Med Clin North Am* 72:1531–43, 1988

14. Alberti KGMM, Marshall SM: Diabetes and surgery. In *The Diabetes Annual/4*. Alberti KGMM, Krall LP, Eds. New York, Elsevier, 1988, p. 248–71
15. Chiasson JL, Liljenquist JE, Finger FE, Lacy WW: Differential sensitivity of glycogenolysis and gluconeogenesis to insulin infusions in dogs. *Diabetes* 25:283–91, 1976
16. Gerich JE, Charles M, Grodsky G: Regulation of pancreatic insulin and glucagon secretion. *Annu Rev Physiol* 38:353–88, 1976
17. Nurjham N, Campbell PJ, Kennedy FP, Miles JM, Gerich JE: Insulin dose-response characteristics for suppression of glycerol release and conversion to glucose in humans. *Diabetes* 35:1326–31, 1986
18. Hood VL, Tannen RL: Regulation of acid production in ketoacidosis and lactic acidosis. *Diabetes Metab Rev* 5:393–409, 1989
19. Clutter WE, Rizza RA, Gerich JA, Cryer PE: Regulation of glucose metabolism by sympathochromaffin catecholamines. *Diabetes Metab Rev* 4:1–15, 1988
20. Rizza RA, Cryer PE, Haymond MW, Gerich JE: Adrenergic mechanisms for the effect of epinephrine and glucose production and clearance in man. *J Clin Invest* 65:682–89, 1980
21. Clutter WE, Bier DM, Shah SD, Cryer PE: Epinephrine plasma metabolic clearance rates and physiological thresholds for metabolic and hemodynamic actions in man. *J Clin Invest* 66:94–101, 1980
22. Shamoon H, Jacob R, Sherwin RS: Epinephrine-induced hypoaminoacidemia in normal and diabetic subjects: effect of beta blockade. *Diabetes* 29:875–81, 1980
23. Miles JM, Nissen SL, Gerich JE, Haymond MW: Effects of epinephrine infusion on leucine and alanine kinetics in humans. *Am J Physiol* 247:E166–72, 1984
24. Fellows IW, Bennett T, Macdonald IA: The affect of adrenaline upon cardiovascular and metabolic functions in man. *Clin Sci (Lond)* 69:215–22, 1985
25. Felig P, Wahren J, Sherwin R, Hendler R: Insulin, glucagon, and somatostatin in normal physiology and diabetes mellitus. *Diabetes* 25:1091–99, 1976
26. Foster DW: From glycogen to ketones—and back. *Diabetes* 33:1188–99, 1984
27. Nosadini R, Del Prato S, Tiengo A, Valerio A, Muggeo M, Opocher G, Mantero F, Duner E, Marescotti C, Molloy F, Belloni F: Insulin resistance in Cushing's syndrome. *J Clin Endocrinol Metab* 57:529–36, 1983
28. McMahon M, Gerich J, Rizza R: Effects of glucocorticoids on carbohydrate metabolism. *Diabetes Metab Rev* 4:17–30, 1988
29. Kaplan S, Shimizu C: Effects of cortisol on amino acids in skeletal muscle and plasma. *Endocrinology* 72:267–71, 1963
30. Leboef B, Renold A, Cahill G: Studies on rat adipose tissue in vitro. *J Biol Chem* 237:988–91, 1962
31. Chan TM: The permissive effects of glucocorticoid on hepatic gluconeogenesis. *J Biol Chem* 259:7426–32, 1984
32. Hornbrook K, Burch H, Lowry O: The effects of adrenalectomy and hydrocortisone on rat liver metabolites and glycogen synthase activity. *Mol Pharmacol* 2:106–16, 1984
33. Johnston D, Gill A, Orskov H, Batstone GF, Alberti KGMM: Metabolic effects of cortisol in man—studies with somatostatin. *Metabolism* 31:312–17, 1982
34. Press M: Growth hormone and metabolism. *Diabetes Metab Rev* 4:391–414, 1988
35. Davidson MB: Effect of growth hormone on carbohydrate and lipid metabolism. *Endocrinol Rev* 8:115–31, 1987
36. Tanner JM, Hughes PCR, Whitehouse RH: Comparative rapidity of response of height, limb muscle and limb fat to treatment with human growth hormone deficiency. *Acta Endocrinol* 84:681–96, 1977
37. Fineberg SE, Merimee TJ: Acute metabolic effects of human growth hormone. *Diabetes* 23:499–504, 1974
38. Allison SP, Tomlin PJ, Chamberlain MJ: Some effects of anaesthesia and surgery on carbohydrate and fat metabolism. *Br J Anaesth* 41:588–92, 1969
39. Brandt MR, Kehlet H, Binder C, Hayer C, McNeilly AS: Effect of epidural analgesia on the glucoregulatory endocrine response to surgery. *Clin Endocrinol* 5:107–14, 1976
40. Brandt MR, Kehlet H, Faber O, Binder C: C-peptide and insulin during blockade of the hyperglycemic response to surgery by epidural analgesia. *Clin Endocrinol* 6:167–70, 1977
41. Clarke RSJ: Hyperglycemic response to different types of surgery and anaesthesia. *Br J Anaesth* 42:45–52, 1970
42. Clarke RSJ, Johnston H, Sheridan B: The influence of anaesthesia and surgery on plasma cortisol, insulin and free fatty acids. *Br J Anaesth* 42:295–99, 1970
43. Russell RCG, Walker CJ, Bloom SR: Hyperglucagonemia in the surgical patient. *Br Med J* 1:10–12, 1975
44. Schwartz SS, Horwitz DL, Zehfus B, Langer B, Moossa AR, Ribeiro G, Kaplan E, Rubenstein AH: Use of a glucose controlled insulin infusion system (artificial beta cell) to control diabetes during surgery. *Diabetologia* 16:157–64, 1979
45. Werb MR, Zinman B, Teasdale SJ, Goldman BS, Skully HE, Marliss EB: Hormone and metabolic responses during coronary artery bypass surgery: role of infused glucose. *J Clin Endocrinol Metab* 69:1010–18, 1989
46. Aarimaa M, Slati P, Haapaniemi L, Jeglinski B: Glucose tolerance and insulin response during and after elective skeletal surgery. *Ann Surg* 179:926–29, 1974
47. Goldberg NJ, Wingert TD, Levin SR, Wilson SE, Viljoen JF: Insulin therapy in the diabetic surgical patient: metabolic and hormone response to low dose insulin infusion. *Diabetes Care* 4:279–84, 1981
48. Halter JB, Pflug AE, Porte D Jr: Adrenergic and non-adrenergic effects of anaesthesia and surgical stress on insulin secretion in man (Abstract). *Clin Res* 26:158A, 1978
49. Wright PD, Henderson K, Johnson IDA: Glucose utilization and insulin secretion during surgery in man. *Br J Surg* 61:5–8, 1974
50. Zaloya GP: Catecholamines in anesthetic and surgical stress. *Int Anesthesiol Clin* 26:187–98, 1988
51. Brown FF, Owens WD, Felts JA, Spitznagel EL, Cryer PE: Plasma epinephrine and norepinephrine levels during anesthesia: enflurane-N<sub>2</sub>O-O<sub>2</sub> compared with fentanyl-N<sub>2</sub>O-O<sub>2</sub>. *Anesth Analg* 61:366–70, 1982
52. Traynor C, Hall GM: Endocrine and metabolic changes during surgery: anaesthetic implications. *Br J Anaesth* 53:153–60, 1981
53. Yao M, Matsuki A, Fukushi S, Kudo T, Kudo M, Oyama T: Episodic secretions of ACTH during halothane anesthesia and surgery. *Jpn J Anesthesiol* 33:525–31, 1984
54. Plumpton FS, Besser GM, Cole PV: Corticosteroid treatment and surgery: an investigation of the indications for steroid coverage. *Anaesthesia* 24:3–11, 1969
55. Nistrup-Madsen S, Engquist A, Badawi I, Kehlet H: Cyclic

- AMP, glucose and cortisol in plasma during surgery. *Horm Metab Res* 8:483–85, 1976
56. Gordon NH, Scott DB, Persy Robb IW: Modification of plasma corticosteroid concentrations during and after surgery by epidural blockade. *Br Med J* 1:581–83, 1973
57. Degoute CS, Ray MJ, Manchon M, Claustrat B, Branssillon V: Intraoperative glucose infusion and blood lactate: endocrine and metabolic relationships during abdominal aortic surgery. *Anesthesiology* 71:355–61, 1989
58. Wagner RI, White PF: Etomidate inhibits adrenocortical function in surgical patients. *Anesthesiology* 61:647–51, 1984
59. Russell RCG, Ellis B, Spargo P, Dudley HAF: The relationship between insulin and growth hormone before, during and after minor surgery. *Br J Surg* 63:666–67, 1973
60. Wright PD, Johnston IDA: The effect of surgical operation on growth hormone levels in plasma. *Surgery* 77:479–86, 1975
61. Miyata M, Yamamoto T, Nakao K: Suppression of glucagon secretion during surgery. *Horm Metab Res* 8:239–40, 1976
62. Foster KJ, Alberti KGMM, Binder C, Hinks L, Karran SJ, Orskov H, Smyth P, Talbot S, Turnell D: Lipid metabolism and nitrogen balance after abdominal surgery in man. *Br J Surg* 66:242–45, 1979
63. Schofield PS, French TJ, Sugden MC: Ketone body metabolism after surgical stress or partial hepatectomy. *Biochem J* 241:475–81, 1987
64. Frayn KN: Hormonal control of metabolism in trauma and sepsis. *Clin Endocrinol* 24:577–99, 1986
65. Goldberg AL, Baracos V, Rodemann P, Waxman L, Dinarello C: Control of protein degradation in muscle by prostaglandins,  $Ca^{2+}$ , and leukocytic pyrogen (interleukin 1). *Fed Proc* 43:1301–306, 1984
66. Dinarello CA, Clowes GHA, Gordon AH, Saravis CA, Wolff SM: Cleavage of human interleukin 1: isolation of a peptide fragment from plasma of febrile humans and activated monocytes. *J Immunol* 133:1332–38, 1984
67. Kehlet H, Brandt MR, Prange Hansen A, Alberti KGMM: Effect of epidural anesthesia on metabolic profiles during and after surgery. *Br J Surg* 66:543–46, 1979
68. Hogan C, Brandt DR, Kohlet H: Prolactin, FSH, GH, and cortisol responses to surgery and the effect of epidural anesthesia. *Acta Endocrinol* 94:151–54, 1980
69. Pflug AE, Halter JB: Effect of spinal anesthesia on adrenergic tone and the neuroendocrine response to surgical stress in humans. *Anesthesiology* 55:120–26, 1981
70. Halter JB, Plung AE: Effect of sympathetic blockade by spinal anesthesia on pancreatic islet function in man. *Am J Physiol* 239:E150–55, 1980
71. Shirasaka C, Tsuji H, Asoh T, Takeuchi Y: Role of the splanchnic nerves in endocrine and metabolic responses to abdominal surgery. *Br J Surg* 73:142–45, 1986
72. Monro JF, Campbell IW, McCuish AG, Duncan LJP: Euglycemic diabetic ketoacidosis. *Br Med J* 2:578–80, 1973
73. Bradley RF: Diabetic ketoacidosis and coma. In *Joslin's Diabetes Mellitus*. 11th ed. Marble A, White P, Bradley R, Krall L, Eds. Philadelphia, PA, Lea & Febiger, 1971, p. 361–416
74. Wheelock FC, Gibbons GW, Marble A: Surgery in diabetes. In *Joslin's Diabetes Mellitus*. 12th ed. Marble A, Krall LP, Bradley RF, Christlieb R, Soeldner JS, Eds. Philadelphia, PA, Lea & Febiger, 1985, p. 712–31
75. Galloway JA, Shuman CR: Diabetes and surgery. *Am J Med* 34:177–91, 1963
76. Burgos LG, Ebert TJ, Asiddao C, Turner LA, Pattison CZ, Wang-Cheng R, Kampine JP: Increased intraoperative cardiovascular morbidity in diabetics with autonomic neuropathy. *Anesthesiology* 70:591–97, 1989
77. Hirsch IB, Farkas-Hirsch R, Skyler JS: Intensive insulin therapy for treatment of diabetes mellitus. *Diabetes Care*. In press
78. *Physician's Guide to Insulin-Dependent (Type I) Diabetes: Diagnosis and Treatment*. Sperling MA, Ed. Alexandria, VA, Am. Diabetes Assoc., 1988, p. 84–87
79. Engel SS: Diabetes in the surgical setting. *Pract Diabetes* 8:10–11, 1989
80. Galloway JA, Spradlin CT, Nelson RL, Wentworth SM, Davidson JA, Swarner JL: Factors influencing the absorption, serum insulin concentration, and blood glucose responses after injections of regular insulin and various insulin mixtures. *Diabetes Care* 4:366–76, 1981
81. Hildebrand P, Sestoft L, Nielson SL: The absorption of subcutaneously injected short-acting soluble insulin: influence of injection technique and concentration. *Diabetes Care* 6:459–62, 1983
82. Taitelman U, Reese EA, Bessman AN: Insulin in the management of the diabetic surgical patient. *JAMA* 237:658–60, 1977
83. Thomas DJB, Platt HS, Alberti KGMM: Insulin-dependent diabetes during the perioperative period: an assessment of continuous glucose-insulin-potassium infusion, and traditional treatment. *Anesthesia* 39:629–37, 1984
84. Walts LF, Miller J, Davidson MB, Brown J: Perioperative management of diabetes mellitus. *Anesthesiology* 55:104–109, 1981
85. Meyers EF, Alberts D, Gordon MO: Perioperative control of blood glucose in diabetic patients: a two-step protocol. *Diabetes Care* 9:40–45, 1986
86. Turner RC, Grayborn JA, Newman GB, Nebarro JDN: Measurement of the insulin delivery rate in man. *J Clin Endocrinol* 33:279–86, 1971
87. Watts NB, Gebhart SSP, Clark RV, Phillips LS: Postoperative management of diabetes mellitus: steady-state glucose control with bedside algorithm for insulin adjustment. *Diabetes Care* 10:722–28, 1987
88. Farkas-Hirsch R, Boyle PJ, Hirsch IB: Glycemic control in the surgical patient with IDDM (Abstract). *Diabetes* 38 (Suppl. 2):39A, 1989
89. Husband DJ, Thai AC, Alberti KGMM: Management of diabetes during surgery with glucose-insulin-potassium infusion. *Diabetic Med* 3:69–74, 1986
90. Ekroth R, Nilsson F, Berggren H, Björntorp P, Hammarsten J, Holm G, Holm J, Schersten T, Waldenström A, William-Olsson G: Insulin sensitivity and glucose uptake in the course of surgical treatment for valvular aortic stenosis. *Scand J Thorac Cardiovasc Surg* 16:137–40, 1982
91. Frater RW, Oka Y, Kadish A, Chilurkur S, Becker RM: Diabetes and coronary artery surgery. *Mt Sinai J Med* 49:237–40, 1982
92. Elwyn DH: Nutritional requirements of adult surgical patients. *Crit Care Med* 8:9–20, 1980
93. Gamble JL: Physiological information gained from studies on the life raft ration. *Harvey Lect* 42:247–73, 1947
94. Askanazi J, Carpentier YA, Jeevanandam M, Michelsen

- CP, Elwyn DH, Kinney JM: Energy expenditure, nitrogen balance, and norepinephrine excretion after injury. *Surgery* 89:478–84, 1981
95. Wolfe RR, Peters EJ: Lipolytic response to glucose infusion in human subjects. *Am J Physiol* 252:E218–23, 1987
  96. Challoner DR, Steinberg D: Effect of free fatty acid on the oxygen consumption of perfused rat heart. *Am J Physiol* 210:280–86, 1966
  97. Tansey MJ, Opie LH: Relation between plasma free fatty acids and arrhythmias within the first twelve hours of acute myocardial infarction. *Lancet* 2:419–21, 1983
  98. Felig P, Marliss E, Owen O, Cahill GF: Blood glucose and gluconeogenesis in fasting man. *Arch Intern Med* 123:293–98, 1969
  99. Thomas DJB, Alberti KGMM: Hyperglycemic effects of Hartmann's solution during surgery in patients with maturity onset diabetes. *Br J Anaesth* 50:185–87, 1978
  100. Jenssen T, Nurjhan N, Consoli A, Gerich J: Increased supply of lactate which increases gluconeogenesis three-fold does not affect overall glucose production in normal man: demonstration of a new homeostatic process (Abstract). *Diabetes* 38 (Suppl. 2):11A, 1989
  101. White PF: Outpatient anesthesia: an overview. In *Outpatient Anesthesia*. White PF, Ed. New York, Churchill Livingstone, 1990, chapt. 1
  102. Christiansen CL, Schurizek BA, Mallin B, Knudsen L, Alberti KGMM, Hermansen K: Insulin treatment of the insulin-dependent diabetic patient undergoing minor surgery. *Anaesthesia* 43:533–37, 1988
  103. White PF, Shafer A: Nausea and vomiting: causes and prophylaxis. *Semin Anesth* 6:300–308, 1987
  104. Gold BS, Kitz DS, Lecky JH, Neuhaus JM: Unanticipated admission to the hospital following ambulatory surgery. *JAMA* 262:3008–10, 1989
  105. Marble A: Late complications of diabetes: a continuing challenge. *Diabetologia* 12:193–99, 1976
  106. Bron AJ, Cheng H: Cataract and retinopathy: screening for treatable retinopathy. *Clin Endocrinol Metab* 15:971–99, 1986
  107. DeFronzo RA, Ferrannini E, Kovisto V: New concepts in the pathogenesis and treatment of non-insulin-dependent diabetes mellitus. *Am J Med* 74 (Suppl. 1A):52–81, 1983
  108. Elsas L, Rosenberg L: Renal glycosuria. In *Strauss and Welt's Diseases of the Kidney*. 3rd ed. Earley L, Gottschalk C, Eds. Boston, MA, Little, Brown, 1979, p. 1021–28
  109. Mallin B, Knudsen L, Christiansen BA, Schurizek BA, Hermansen K: Insulin treatment in non-insulin-dependent diabetes mellitus undergoing minor surgery. *Diabetes Nutr Metab* 2:125–31, 1989
  110. Shulman GI, Rothman DL, Jue T, Stein P, DeFronzo RA, Shulman RG: Quantitation of muscle glycogen synthesis in normal subjects and subjects with non-insulin dependent diabetes by <sup>13</sup>C nuclear magnetic resonance spectroscopy. *N Engl J Med* 322:223–28, 1990
  111. Alberti KGMM, Thomas DJB: The management of diabetes during surgery. *Br J Anaesth* 51:693–710, 1979
  112. Barum D, Dillard DH, Porte D Jr: Inhibition of insulin release in infants undergoing deep hypothermic cardiovascular surgery. *N Engl J Med* 279:1309–14, 1968
  113. Seki S: Clinical features of hyperosmolar hyperglycemic nonketotic diabetic coma associated with cardiac operations. *J Thorac Cardiovasc Surg* 91:867–73, 1986
  114. Brenner WI, Lansky Z, Engleman RM, Stahl WM: Hyperosmolar coma in surgical patients: an iatrogenic disease of increasing incidence. *Ann Surg* 178:651–54, 1973
  115. Walker M, Marshall SM, Alberti KGMM: Clinical aspects of diabetic ketoacidosis. *Diabetes Metab Rev* 5:651–63, 1989
  116. Campbell EW, Duncan LJP, Innes JA, MacCuish AC, Nunro JF: Abdominal pain in diabetic metabolic decompensation: clinical significance. *JAMA* 233:166–68, 1975
